# Supplementary material for: High ionicity ionic liquids (HIILs): comparing the effect of ethylsulfonate and ethylsulfate anions
Source: Royal Society of Chemistry journal article supplement (doi:10.1039/c3cp52642a), 2013-01-01
Supplement: c3cp52642a.pdf [file c3cp52642a.pdf]

## SUPPORTING INFORMATION

High Ionicity Ionic Liquids (HILs): Comparing Ethylsulfonate and Ethylsulfate Anion Effect.

**Filipe S. Oliveira<sup>a</sup>, Ana B. Pereira<sup>a</sup>, João M. M. Araújo<sup>a</sup>, Carlos E. S. Bernardes<sup>b</sup>, José N. Canongia Lopes<sup>a,b</sup>, Smilja Todorovic<sup>a</sup>, Gabriel Feio<sup>c</sup>, Pedro L. Almeida<sup>c,d</sup>, Luís P. N. Rebelo<sup>a</sup> and Isabel M. Marrucho<sup>a,e\*</sup>**

<sup>a</sup> Instituto de Tecnologia Química e Biológica, Universidade Nova de Lisboa, Av. da República, 2780-157 Oeiras, Portugal.

<sup>b</sup> Centro de Química Estrutural, IST/UTL, 1049-001 Lisboa, Portugal

<sup>c</sup> CENIMAT/13N, Departamento de Ciência dos Materiais, Faculdade de Ciências e Tecnologia, Universidade Nova de Lisboa, 2829-516 Caparica, Portugal

<sup>d</sup> Área Departamental de Física, Instituto Superior de Engenharia de Lisboa, R. Conselheiro Emídio Navarro, 1, 1950-062 Lisboa, Portugal

<sup>e</sup> Departamento de Química, Universidade de Aveiro, Campus Universitário de Santiago, 3810-193 Aveiro, Portugal

\*Corresponding Author: imarrucho@itqb.unl.pt (Isabel M. Marrucho)

### 1. Experimental Methods

#### 1.1. Refractive index measurements

The refractive indexes were measured in the temperature range between 298.15 and 323.15 K at the sodium D-line using a Carl Zeiss Abbé refractometer with a precision of  $\pm 5 \times 10^{-5}$ . The temperature in the refractometer cell was controlled using an external thermostatic bath and measured with the refractometer thermometer ( $\pm 0.05$  K accuracy). Samples were directly introduced in the cell (prism assembly) using a syringe.

At least three independent measurements were taken for each sample at each temperature to assure the effectiveness of the measurement. The absolute uncertainty of the refractive indices is  $\pm 0.00005$ .

#### 1.2. Thermal stability measurements

Thermogravimetric analyses (TGA) were carried out using a TA instrument Model TGA Q50. Nitrogen was used as the sample gas for the TGA measurements at a flow rate of  $60 \text{ ml} \times \text{min}^{-1}$ . All samples were recorded in aluminium pans within a nitrogen atmosphere. Samples were heated to 873 K at a rate of  $10 \text{ Kmin}^{-1}$  until complete thermal degradation was achieved. Universal Analysis, version 4.4A software, was used to determine the onset temperatures ( $T_{\text{onset}}$ ) corresponding to the temperature at which the baseline slope changed during heating. The relative uncertainty of the

temperature is  $\pm 0.50\%$ . At least three independent measurements were taken for each sample to ensure the accuracy of the measurement.

## 2. Results and Discussion

### 2.1. Ionicity

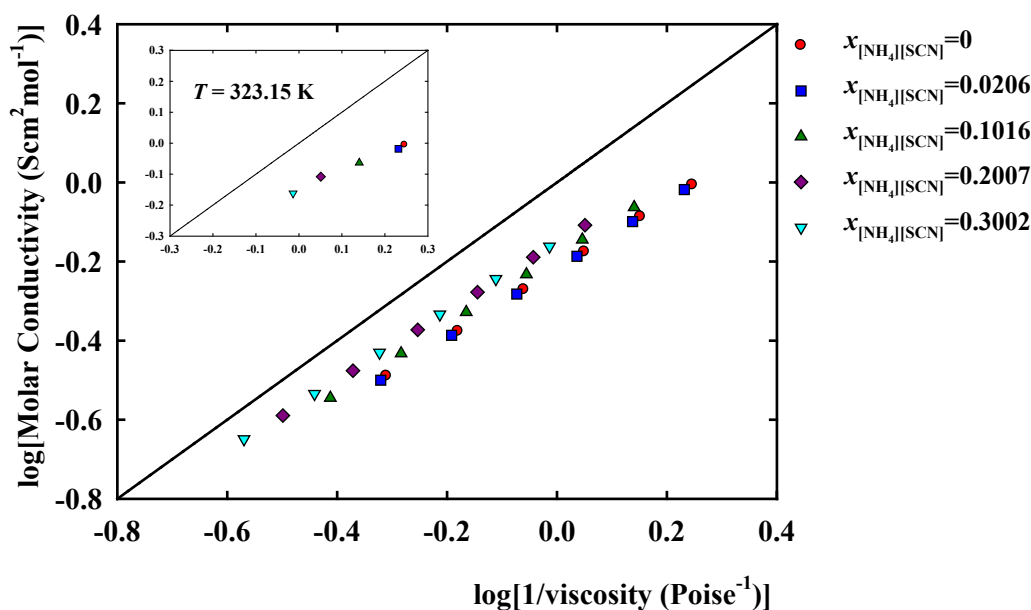

**Figure S1.** Walden plot for the binary system  $[\text{C}_2\text{MIM}][\text{C}_2\text{SO}_3] + [\text{NH}_4][\text{SCN}]$  as a function of the inorganic salt concentration. The inside figure shows the behaviour of the binary system at 323.15 K.

### 2.2. Density

The density values measured for the  $[\text{C}_2\text{MIM}][\text{C}_2\text{SO}_3] + [\text{NH}_4][\text{SCN}]$  system at temperatures between 293.15 and 323.15 K and at atmospheric pressure are listed in Table S1. Figure S2 illustrates the temperature dependence of the density for this mixture at a concentration of 0.3 in molar fraction of  $[\text{NH}_4][\text{SCN}]$  and compares it with the pure ionic liquid,  $[\text{C}_2\text{MIM}][\text{C}_2\text{SO}_3]$ . Also, results for the pure  $[\text{C}_2\text{MIM}][\text{C}_2\text{SO}_4]$  IL and its binary mixture  $[\text{C}_2\text{MIM}][\text{C}_2\text{SO}_4] + [\text{NH}_4][\text{SCN}]$  (also at a IS's molar fraction of 0.3  $[\text{NH}_4][\text{SCN}]$ ) are plotted<sup>S1</sup>. The inorganic salts mole fraction of 0.3 was chosen for comparison of the two ionic liquids. The density of pure  $[\text{C}_2\text{MIM}][\text{C}_2\text{SO}_4]$  is higher than the pure  $[\text{C}_2\text{MIM}][\text{C}_2\text{SO}_3]$  and for both binary mixtures the density is lower than the neat ILs. This behaviour is different than that found for other binary mixtures of IL+IS where the addition of salt increased the density of the mixture. The 1-ethyl-3-methylimidazolium acetate + ammonium thiocyanate system in our previous work<sup>S1</sup> as

well as the mixtures of 1-ethyl-3-methylimidazolium bis(fluorosulfonyl)amide and 1-ethyl-3-methylimidazolium bis(trifluoromethylsulfonyl)amide with their respective lithium salts<sup>S2</sup> are examples of increased density with the addition of inorganic salt. Lassègues et al.<sup>S3</sup> and Monteiro et al.<sup>S4</sup> also reported density data of mixtures of different ILs based on alkyl-substituted imidazolium cations and bis(trifluoromethylsulfonyl)amide anions, with the lithium bis(trifluoromethylsulfonyl)amide salt, where the density of the mixture was higher than the neat IL. Moreover, the effect of the addition of  $[\text{NH}_4][\text{SCN}]$  is more pronounced in the density of the  $[\text{C}_2\text{MIM}][\text{C}_2\text{SO}_4]$  than the  $[\text{C}_2\text{MIM}][\text{C}_2\text{SO}_3]$ . This finding is corroborated by Raman data, which indicate a formation of 'unengaged' SCN only in the former IL.

**Table S1.** Density,  $\rho$ , dynamic viscosity,  $\eta$ , ionic conductivity,  $\sigma$ , refractive index,  $n_D$ , molar volume,  $V_m$ , molar refraction,  $R_m$ , and free molar volume,  $f_m$ , for the binary system  $[\text{C}_2\text{MIM}][\text{C}_2\text{SO}_3]$  (1) +  $[\text{NH}_4][\text{SCN}]$  (2) at several temperatures.

| $x_2$                  | $\rho$<br>(g·cm <sup>-3</sup> ) | $\eta$<br>(mPa·s) | $\sigma$<br>(mS·cm <sup>-1</sup> ) | $n_D$   | $V_m$    | $R_m$   | $f_m$    |
|------------------------|---------------------------------|-------------------|------------------------------------|---------|----------|---------|----------|
| $T = 298.15 \text{ K}$ |                                 |                   |                                    |         |          |         |          |
| 0                      | 1.2037                          | 204.35            | 1.770                              | 1.49181 | 183.0130 | 53.0779 | 129.9351 |
| 0.0206                 | 1.2035                          | 209.26            | 1.751                              | 1.49181 | 180.5757 | 52.3711 | 128.2047 |
| 0.1016                 | 1.2025                          | 258.52            | 1.668                              | 1.49482 | 171.0051 | 49.8531 | 121.1520 |
| 0.2007                 | 1.2004                          | 315.24            | 1.615                              | 1.49816 | 159.4072 | 46.7385 | 112.6687 |
| 0.3002                 | 1.1973                          | 371.13            | 1.518                              | 1.50184 | 147.8392 | 43.6178 | 104.2214 |
| $T = 303.15 \text{ K}$ |                                 |                   |                                    |         |          |         |          |
| 0                      | 1.2004                          | 151.41            | 2.290                              | 1.48947 | 183.5162 | 53.0084 | 130.5078 |
| 0.0206                 | 1.2002                          | 155.49            | 2.267                              | 1.48947 | 181.0672 | 52.3010 | 128.7662 |
| 0.1016                 | 1.1993                          | 192.11            | 2.155                              | 1.49314 | 171.4662 | 49.8436 | 121.6225 |
| 0.2007                 | 1.1972                          | 235.08            | 2.090                              | 1.49615 | 159.8333 | 46.7030 | 113.1303 |
| 0.3002                 | 1.1941                          | 276.11            | 1.970                              | 1.50051 | 148.2312 | 43.6348 | 104.5964 |
| $T = 308.15 \text{ K}$ |                                 |                   |                                    |         |          |         |          |
| 0                      | 1.1971                          | 114.96            | 2.912                              | 1.48846 | 184.0118 | 53.0582 | 130.9536 |
| 0.0206                 | 1.1970                          | 118.33            | 2.876                              | 1.48879 | 181.5563 | 52.3806 | 129.1757 |
| 0.1016                 | 1.1961                          | 146.23            | 2.734                              | 1.49248 | 171.9201 | 49.9185 | 122.0016 |
| 0.2007                 | 1.1941                          | 179.27            | 2.645                              | 1.49482 | 160.2483 | 46.7172 | 113.5311 |
| 0.3002                 | 1.1910                          | 210.28            | 2.499                              | 1.49917 | 148.6170 | 43.6492 | 104.9679 |
| $T = 313.15 \text{ K}$ |                                 |                   |                                    |         |          |         |          |
| 0                      | 1.1939                          | 89.18             | 3.619                              | 1.48779 | 184.5102 | 53.1401 | 131.3701 |
| 0.0206                 | 1.1938                          | 91.97             | 3.572                              | 1.48846 | 182.0430 | 52.4905 | 129.5525 |
| 0.1016                 | 1.1930                          | 113.64            | 3.396                              | 1.49080 | 172.3765 | 49.9061 | 122.4704 |
| 0.2007                 | 1.1910                          | 139.49            | 3.286                              | 1.49448 | 160.6609 | 46.8104 | 113.8505 |
| 0.3002                 | 1.1880                          | 163.36            | 3.112                              | 1.49750 | 148.9923 | 43.6353 | 105.3571 |
| $T = 318.15 \text{ K}$ |                                 |                   |                                    |         |          |         |          |
| 0                      | 1.1907                          | 70.52             | 4.425                              | 1.48545 | 185.0112 | 53.0662 | 131.9450 |
| 0.0206                 | 1.1906                          | 72.85             | 4.362                              | 1.48645 | 182.5323 | 52.4474 | 130.0849 |
| 0.1016                 | 1.1899                          | 89.94             | 4.145                              | 1.48980 | 172.8256 | 49.9493 | 122.8762 |
| 0.2007                 | 1.1880                          | 110.48            | 4.016                              | 1.49314 | 161.0756 | 46.8235 | 114.2521 |
| 0.3002                 | 1.1851                          | 129.19            | 3.816                              | 1.49716 | 149.3653 | 43.7194 | 105.6459 |
| $T = 323.15 \text{ K}$ |                                 |                   |                                    |         |          |         |          |
| 0                      | 1.1875                          | 56.73             | 5.315                              | 1.48478 | 185.5098 | 53.1469 | 132.3629 |
| 0.0206                 | 1.1874                          | 58.68             | 5.240                              | 1.48511 | 183.0191 | 52.4640 | 130.5550 |
| 0.1016                 | 1.1868                          | 72.38             | 4.992                              | 1.48913 | 173.2770 | 50.0212 | 123.2558 |
| 0.2007                 | 1.1850                          | 88.92             | 4.827                              | 1.49248 | 161.4834 | 46.8881 | 114.5953 |
| 0.3002                 | 1.1824                          | 103.20            | 4.600                              | 1.49649 | 149.7064 | 43.7689 | 105.9375 |

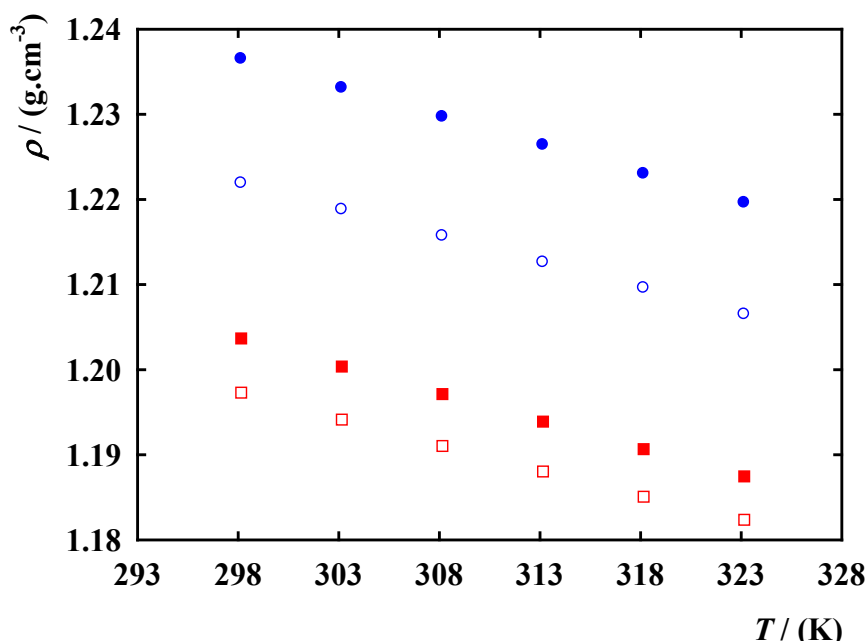

**Figure S2.** Density as a function of temperature for [C<sub>2</sub>MIM][C<sub>2</sub>SO<sub>4</sub>]<sup>S1</sup> (blue filled circle), [C<sub>2</sub>MIM][C<sub>2</sub>SO<sub>4</sub>] + x<sub>[NH<sub>4</sub>][SCN]=0.3<sup>S1</sup> (blue empty circle), [C<sub>2</sub>MIM][C<sub>2</sub>SO<sub>3</sub>] (red filled square) and [C<sub>2</sub>MIM][C<sub>2</sub>SO<sub>3</sub>] + x<sub>[NH<sub>4</sub>][SCN]=0.3 (red empty square).</sub></sub>

### 2.3. Refractive Index

The refractive indexes for the system [C<sub>2</sub>MIM][C<sub>2</sub>SO<sub>3</sub>] + [NH<sub>4</sub>][SCN] are shown in Table S1, for the concentration range between 0 and 0.3 mole fraction of salt. For the system [C<sub>2</sub>MIM][C<sub>2</sub>SO<sub>4</sub>] + [NH<sub>4</sub>][SCN], the refractive indexes along with the molar volume, molar refraction, and free molar volume values are depicted in Table S2 for the all concentration range of salt. In both systems, the addition of salt increased the refractive index of the mixture, and within the studied concentration range of [NH<sub>4</sub>][SCN], it decreased linearly with increasing temperature.

The Lorentz–Lorenz equation (1) can be used to calculate the molar refraction or molar polarizability<sup>SS</sup>,  $R_m$ , which can be related both to density,  $\rho$ , and refractive index,  $n_D$ .

$$R_m = \left( \frac{n_D^2 - 1}{n_D^2 + 2} \right) V_m \quad (1)$$

where  $V_m$  is the molar volume. The molar refraction is considered as a measure of the hard-core volume of one molecule and it can be used to calculate the molar free,  $f_m$ , volume of a solution<sup>S6</sup>, by:

$$f_m = (V_m - R_m) \quad (2)$$

The values for the calculated molar refractions (from equation 1) and molar free volumes (from equation 2) of all the studied samples are listed in Tables S1 and S2 together with the molar volume calculated from density values. Figure S3 illustrates the molar free volumes for the neat ILs, [C<sub>2</sub>MIM][C<sub>2</sub>SO<sub>4</sub>] and [C<sub>2</sub>MIM][C<sub>2</sub>SO<sub>3</sub>], and their binary mixtures with [NH<sub>4</sub>][SCN] at a concentration of 0.3 in molar fraction of salt. It can be observed that the molar free volumes decrease with [NH<sub>4</sub>][SCN] concentration and increase as the temperature increases. In addition, the [C<sub>2</sub>MIM][C<sub>2</sub>SO<sub>4</sub>] ionic liquid shows higher molar free volume in the whole range of temperature, which means that it has more space available to accommodate [NH<sub>4</sub>][SCN] than [C<sub>2</sub>MIM][C<sub>2</sub>SO<sub>3</sub>]. This is at least part of the answer for the higher solubility limit of the inorganic salts in [C<sub>2</sub>MIM][C<sub>2</sub>SO<sub>4</sub>] than in [C<sub>2</sub>MIM][C<sub>2</sub>SO<sub>3</sub>].

The analysis of the molar free volumes can be related with the solubility of different species in the mixtures of ionic liquid and inorganic salts, especially low molecular weight solutes that are gaseous at normal conditions. However, the mechanisms of solvation of some of these species, for example CO<sub>2</sub><sup>S7, S8</sup> are controlled by the interactions and only to a minor extent by molar free volume effect<sup>S9</sup>. Therefore, refractive data can be useful to evaluate the importance of the dispersive molecular interactions and the size of the apolar domains (dominated by dispersive molecular interactions) in the pure ionic liquids or mixtures with ionic liquids<sup>S6</sup>.

**Table S2.** Refractive index,  $n_D$ , molar volume,  $V_m$ , molar refraction,  $R_m$ , and free molar volume,  $f_m$ , for the binary system  $[C_2MIM][C_2SO_4]$  (1) +  $[NH_4][SCN]$  (2) at several temperatures.

| $x_2$        | $n_D$   | $V_m$    | $R_m$   | $f_m$    |
|--------------|---------|----------|---------|----------|
| T = 298.15 K |         |          |         |          |
| 0            | 1.47875 | 191.0958 | 54.1652 | 136.9306 |
| 0.0235       | 1.47976 | 188.1278 | 53.4201 | 134.7077 |
| 0.1553       | 1.48477 | 171.8267 | 49.2259 | 122.6008 |
| 0.3025       | 1.48980 | 153.7266 | 44.4295 | 109.2972 |
| 0.4042       | 1.49582 | 141.0419 | 41.1887 | 99.8532  |
| 0.5205       | 1.50385 | 126.1104 | 37.3329 | 88.7776  |
| 0.5650       | 1.50987 | 120.2325 | 35.9516 | 84.2809  |
| 0.5997       | 1.51389 | 115.6491 | 34.8107 | 80.8384  |
| T = 303.15 K |         |          |         |          |
| 0            | 1.47775 | 191.6227 | 54.2176 | 137.4052 |
| 0.0235       | 1.47875 | 188.6468 | 53.4711 | 135.1757 |
| 0.1553       | 1.48277 | 172.2888 | 49.1845 | 123.1043 |
| 0.3025       | 1.48879 | 154.1176 | 44.4643 | 109.6534 |
| 0.4042       | 1.49381 | 141.4023 | 41.1518 | 100.2505 |
| 0.5205       | 1.50284 | 126.4337 | 37.3651 | 89.0686  |
| 0.5650       | 1.50887 | 120.5407 | 35.9841 | 84.5565  |
| 0.5997       | 1.51188 | 115.9646 | 34.7907 | 81.1740  |
| T = 308.15 K |         |          |         |          |
| 0            | 1.47674 | 192.1526 | 54.2691 | 137.8834 |
| 0.0235       | 1.47775 | 189.1686 | 53.5232 | 135.6454 |
| 0.1553       | 1.48177 | 172.7393 | 49.2259 | 123.5133 |
| 0.3025       | 1.48779 | 154.5106 | 44.5000 | 110.0106 |
| 0.4042       | 1.49181 | 141.7646 | 41.1152 | 100.6494 |
| 0.5205       | 1.50184 | 126.7586 | 37.3981 | 89.3605  |
| 0.5650       | 1.50686 | 120.8504 | 35.9563 | 84.8942  |
| 0.5997       | 1.51088 | 116.2530 | 34.8197 | 81.4333  |
| T = 313.15 K |         |          |         |          |
| 0            | 1.47474 | 192.6696 | 54.2197 | 138.4499 |
| 0.0235       | 1.47574 | 189.6778 | 53.4740 | 136.2038 |
| 0.1553       | 1.48076 | 173.1921 | 49.2666 | 123.9255 |
| 0.3025       | 1.48678 | 154.9056 | 44.5351 | 110.3706 |
| 0.4042       | 1.49080 | 142.1169 | 41.1454 | 100.9715 |
| 0.5205       | 1.50083 | 127.0746 | 37.4274 | 89.6471  |
| 0.5650       | 1.50586 | 121.1517 | 35.9858 | 85.1659  |
| 0.5997       | 1.50886 | 116.5429 | 34.7901 | 81.7528  |
| T = 318.15 K |         |          |         |          |
| 0            | 1.47373 | 193.2052 | 54.2713 | 138.9339 |
| 0.0235       | 1.47474 | 190.1898 | 53.5218 | 136.6679 |
| 0.1553       | 1.47875 | 173.6473 | 49.2195 | 124.4278 |
| 0.3025       | 1.48578 | 155.2898 | 44.5674 | 110.7225 |
| 0.4042       | 1.48980 | 142.4710 | 41.1764 | 101.2946 |
| 0.5205       | 1.49883 | 127.3815 | 37.3909 | 89.9907  |
| 0.5650       | 1.50485 | 121.4545 | 36.0149 | 85.4396  |
| 0.5997       | 1.50787 | 116.8342 | 34.8198 | 82.0144  |
| T = 323.15 K |         |          |         |          |
| 0            | 1.47273 | 193.7439 | 54.3241 | 139.4197 |
| 0.0235       | 1.47373 | 190.7045 | 53.5688 | 137.1357 |
| 0.1553       | 1.47675 | 174.1049 | 49.1729 | 124.9321 |
| 0.3025       | 1.48478 | 155.6888 | 44.6034 | 111.0854 |
| 0.4042       | 1.48879 | 142.8268 | 41.2068 | 101.6200 |
| 0.5205       | 1.49783 | 127.7006 | 37.4208 | 90.2798  |
| 0.5650       | 1.50385 | 121.7588 | 36.0446 | 85.7141  |
| 0.5997       | 1.50686 | 117.1269 | 34.8484 | 82.2785  |

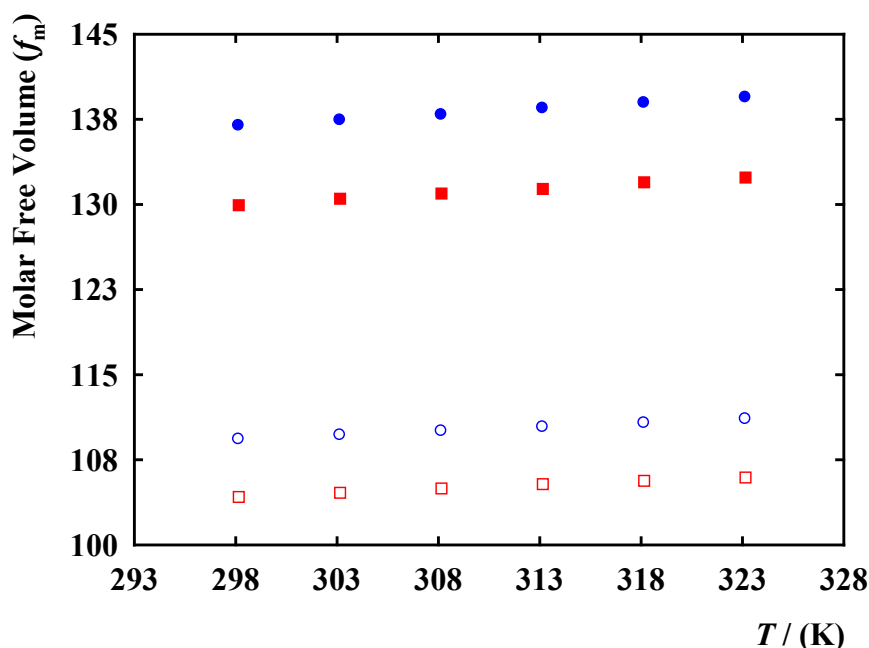

**Figure S3.** Molar Free Volume as a function of temperature for [C<sub>2</sub>MIM][C<sub>2</sub>SO<sub>4</sub>] (blue filled circle), [C<sub>2</sub>MIM][C<sub>2</sub>SO<sub>4</sub>] + x<sub>[NH<sub>4</sub>][SCN]</sub>=0.3 (blue empty circle), [C<sub>2</sub>MIM][C<sub>2</sub>SO<sub>3</sub>] (red filled square) and [C<sub>2</sub>MIM][C<sub>2</sub>SO<sub>3</sub>] + x<sub>[NH<sub>4</sub>][SCN]</sub>=0.3 (red empty square).

#### 2.4. Thermogravimetric Analysis

The thermal decomposition temperatures as a function of inorganic salt concentration are listed in Table S3 and the onset temperature versus [NH<sub>4</sub>][SCN] concentration is plotted in Figure S4. The results for the binary mixtures indicate that the thermal decomposition temperatures decrease when the inorganic salt concentration increases. However, a deviation from this behaviour is observed for the binary mixture [C<sub>2</sub>MIM][C<sub>2</sub>SO<sub>4</sub>] + [NH<sub>4</sub>][SCN] in the onset temperatures at x [NH<sub>4</sub>][SCN] > 0.35. From this point, the onset temperatures stabilize with the addition of inorganic salt.

**Table S3.** Thermal decomposition temperatures for the binary system [C<sub>2</sub>MIM][C<sub>2</sub>SO<sub>3</sub>] or [C<sub>2</sub>MIM][C<sub>2</sub>SO<sub>4</sub>] (1) + [NH<sub>4</sub>][SCN] (2).

| [C <sub>2</sub> MIM][C <sub>2</sub> SO <sub>3</sub> ] |                        | [C <sub>2</sub> MIM][C <sub>2</sub> SO <sub>4</sub> ] |                        |
|-------------------------------------------------------|------------------------|-------------------------------------------------------|------------------------|
| x <sub>2</sub>                                        | T <sub>onset</sub> (K) | x <sub>2</sub>                                        | T <sub>onset</sub> (K) |
| 0                                                     | 626.20                 | 0                                                     | 621.29                 |
| 0.0206                                                | 623.75                 | 0.0235                                                | 620.93                 |
| 0.1016                                                | 621.72                 | 0.1553                                                | 605.10                 |
| 0.2007                                                | 611.98                 | 0.3025                                                | 573.80                 |
| 0.3002                                                | 565.54                 | 0.4042                                                | 529.17                 |
| 1                                                     | 462.97                 | 0.5205                                                | 518.05                 |

|        |        |
|--------|--------|
| 0.5650 | 517.84 |
| 0.5997 | 525.33 |
| 1      | 462.97 |

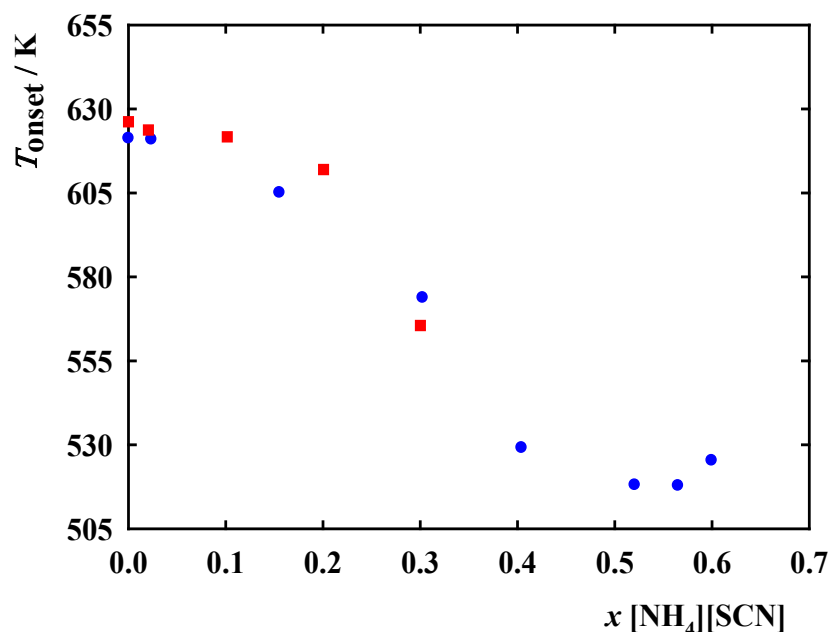

**Figure S4.** The onset temperature,  $T_{\text{onset}}$ , as a function of  $[\text{NH}_4][\text{SCN}]$  concentration in the solubility range for the binary systems  $[\text{C}_2\text{MIM}][\text{C}_2\text{SO}_4]$  (blue filled circle) or  $[\text{C}_2\text{MIM}][\text{C}_2\text{SO}_3] + [\text{NH}_4][\text{SCN}]$ .

## 2.5. NMR Studies

**Table S4.**  $^1\text{H}$  NMR and  $^{13}\text{C}$  NMR chemical shifts (ppm) of  $[\text{C}_2\text{MIM}][\text{C}_2\text{SO}_3]$  and the effect of  $[\text{NH}_4][\text{SCN}]$  concentration upon the chemical shifts in  $\text{DMSO}-d_6$  at 298.15 K.

| Position | Molar fraction of $[\text{NH}_4][\text{SCN}]$ |        |        |        |        |                     |         |         |         |         |
|----------|-----------------------------------------------|--------|--------|--------|--------|---------------------|---------|---------|---------|---------|
|          | 0                                             | 0.1332 | 0.2418 | 0.3384 | 0.3939 | 0                   | 0.1332  | 0.2418  | 0.3384  | 0.3939  |
|          | $^1\text{H}$ NMR                              |        |        |        |        | $^{13}\text{C}$ NMR |         |         |         |         |
| 2        | 9.397                                         | 9.319  | 9.261  | 9.160  | 9.117  | 136.639             | 136.553 | 136.444 | 136.368 | 136.322 |
| 4        | 7.951                                         | 7.895  | 7.846  | 7.780  | 7.750  | 123.463             | 123.432 | 123.445 | 123.413 | 123.399 |
| 5        | 7.843                                         | 7.793  | 7.751  | 7.687  | 7.660  | 121.939             | 121.896 | 121.893 | 121.855 | 121.837 |
| 6        | 3.916                                         | 3.899  | 3.879  | 3.860  | 3.852  | 35.425              | 35.453  | 35.526  | 35.545  | 35.565  |
| 7        | 4.245                                         | 4.226  | 4.214  | 4.185  | 4.177  | 43.934              | 43.983  | 44.037  | 44.079  | 44.104  |
| 8        | 1.383                                         | 1.378  | 1.392  | 1.364  | 1.364  | 15.061              | 15.027  | 15.050  | 15.023  | 15.018  |
| 9        | 2.473                                         | 2.484  | 2.485  | 2.504  | 2.513  | 45.188              | 45.168  | 45.159  | 45.146  | 45.143  |
| 10       | 1.064                                         | 1.053  | 1.066  | 1.028  | 1.026  | 9.727               | 9.626   | 9.651   | 9.553   | 9.529   |
| 12       | -                                             | -      | -      | -      | -      | -                   | 129.953 | 130.003 | 130.193 | 130.274 |



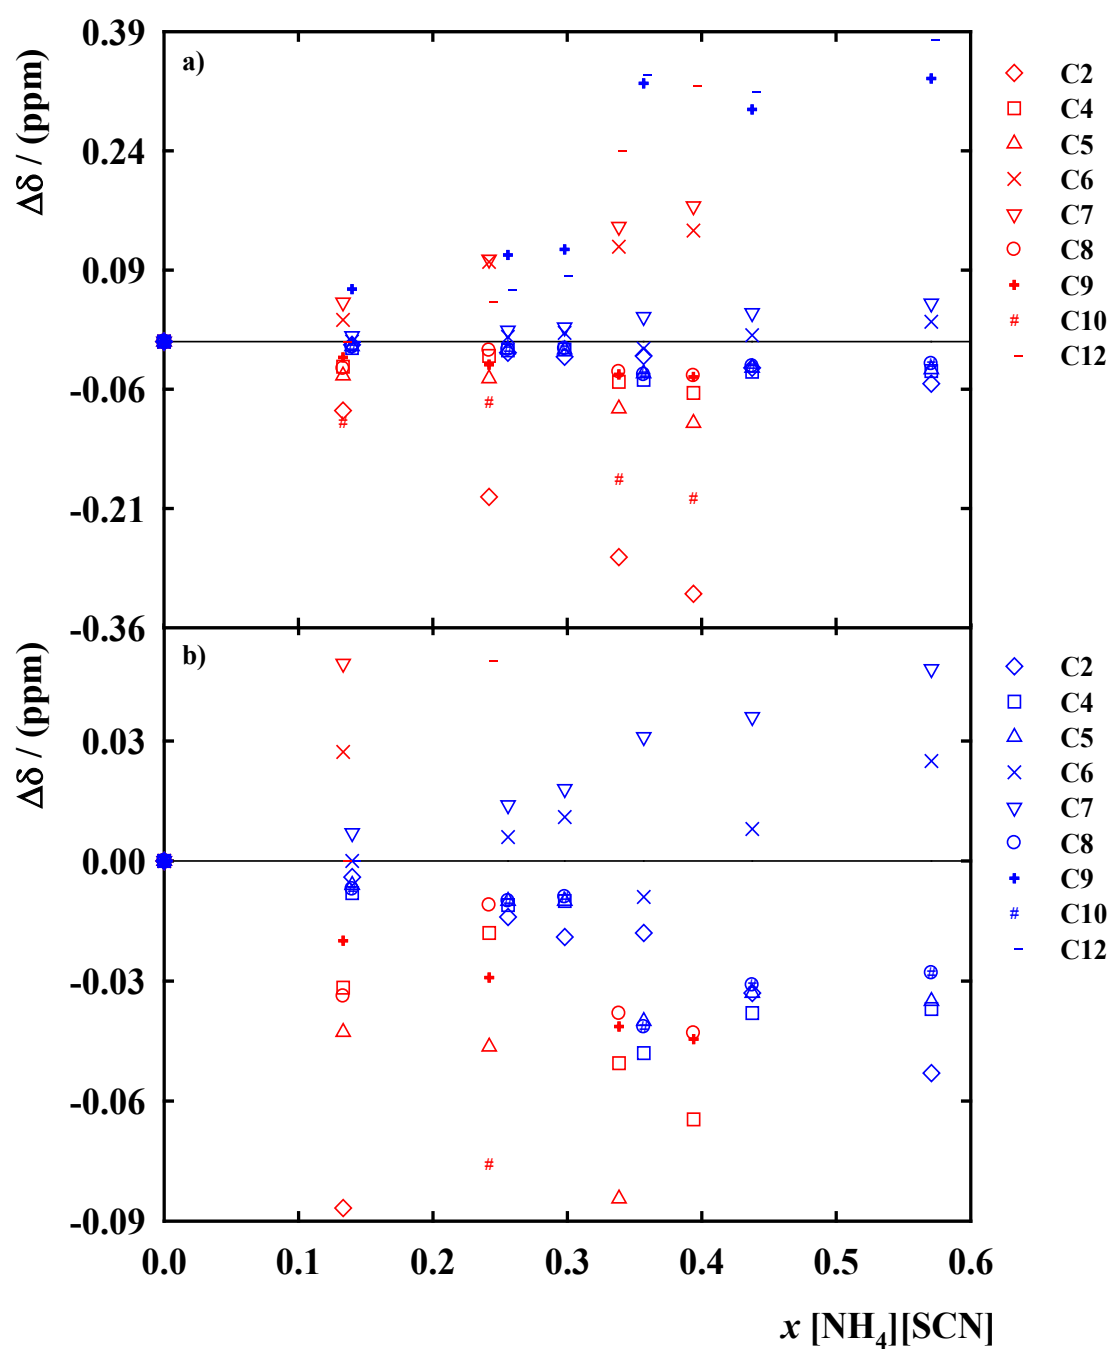

**Figure S5.** Trend of the chemical shift difference of carbons in <sup>13</sup>C NMR of [C<sub>2</sub>MIM][C<sub>2</sub>SO<sub>3</sub>] (red) and [C<sub>2</sub>MIM][C<sub>2</sub>SO<sub>4</sub>]<sup>S1</sup> (blue) with increasing [NH<sub>4</sub>][SCN] concentration ( $\Delta\delta = \delta - \delta_{\text{neat}}$ ) (b is an enlarged image of a).

## 2.6. Raman Studies

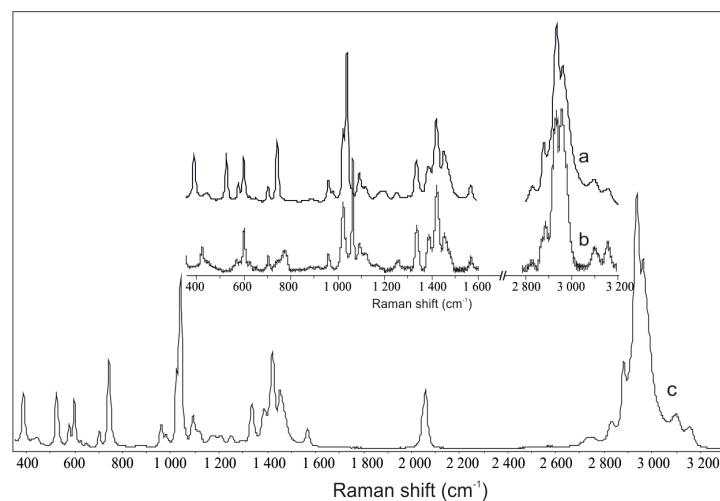

**Figure S6.** Raman spectra of a)  $[\text{C}_2\text{MIM}][\text{C}_2\text{SO}_3]$ , b)  $[\text{C}_2\text{MIM}][\text{C}_2\text{SO}_4]$  and c)  $[\text{C}_2\text{MIM}][\text{C}_2\text{SO}_3] + [\text{NH}_4][\text{SCN}]$  ( $x_{[\text{NH}_4][\text{SCN}]} = 0.17$ ). a) and c) were measured with 400 mW laser power and 1064 nm excitation; b) was recorded with 3 mW laser power, 60s accumulation time, and 413 nm excitation. Spectral intensities are normalized for clearer comparison.

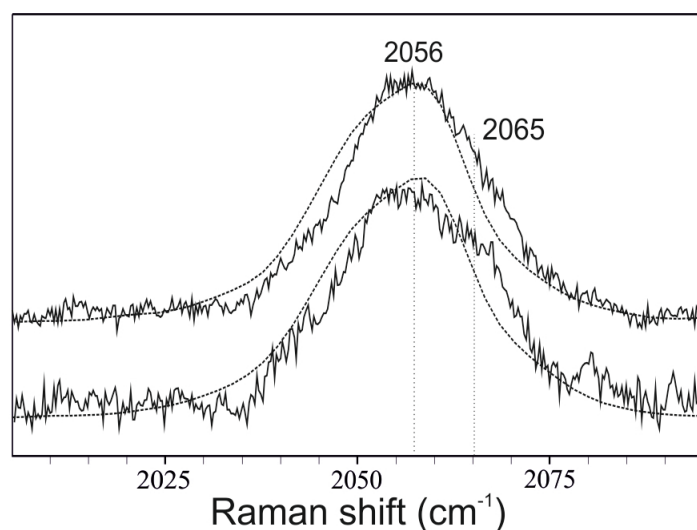

**Figure S7.** Raman spectra of  $[\text{C}_2\text{MIM}][\text{C}_2\text{SO}_4] + [\text{NH}_4][\text{SCN}]$  (solid lines) and  $[\text{C}_2\text{MIM}][\text{C}_2\text{SO}_3] + [\text{NH}_4][\text{SCN}]$  (dotted lines) binary mixtures, for  $x_{[\text{NH}_4][\text{SCN}]} = 0.17$  (upper traces) and for  $x_{[\text{NH}_4][\text{SCN}]} = 0.25$  (lower traces). Spectra of  $[\text{C}_2\text{MIM}][\text{C}_2\text{SO}_4] + [\text{NH}_4][\text{SCN}]$  were recorded with 3 mW laser power, 60s accumulation time, and 413 nm excitation. Spectra of the  $[\text{C}_2\text{MIM}][\text{C}_2\text{SO}_3] + [\text{NH}_4][\text{SCN}]$  mixtures were measured with 400 mW laser power and 1064 nm excitation. Spectral intensities were normalized to 1 for clearer comparison.

## References

- S1. A. B. Pereiro, J. M. M. Araújo, F. S. Oliveira, C. E. S. Bernardes, J. M. S. S. Esperança, J. N. C. Lopes, I. M. Marrucho and L. P. N. Rebelo, *Chem. Commun.*, 2012, **48**, 3656-3658.
- S2. S. Tsuzuki, K. Hayamizu and S. Seki, *J. Phys. Chem. B*, 2010, **114**, 16329-16336.
- S3. J. C. Lassegues, J. Grondin, C. Aupetit and P. Johansson, *J. Phys. Chem. A*, 2009, **113**, 305-314.
- S4. M. J. Monteiro, F. F. C. Bazito, L. J. A. Siqueira, M. C. C. Ribeiro and R. M. Torresi, *J. Phys. Chem. B*, 2008, **112**, 2102-2109.
- S5. M. R. Moldover, in *Vol. VI: Measurement of the Thermodynamic Properties of Single Phases*, eds. A. R. H. Goodwin, K. N. Marsh and W. A. Wakeham, Elsevier, 2003, pp. 435–451.
- S6. M. Tariq, P. A. S. Forte, M. F. C. Gomes, J. N. C. Lopes and L. P. N. Rebelo, *J. Chem. Thermodyn.*, 2009, **41**, 790-798.
- S7. C. Cadena, J. L. Anthony, J. K. Shah, T. I. Morrow, J. F. Brennecke and E. J. Maginn, *J. Am. Chem. Soc.*, 2004, **126**, 5300-5308.
- S8. J. Deschamps, M. F. C. Gomes and A. A. H. Padua, *Chemphyschem*, 2004, **5**, 1049-1052.
- S9. M. F. C. Gomes and A. A. H. Padua, *Pure Appl. Chem.*, 2005, **77**, 653-665.
